# Supplementary material for: Hyperactive neuronal autophagy depletes BDNF and impairs adult hippocampal neurogenesis in a corticosterone-induced mouse model of depression
Source: PubMed Central journal article supplement (PMC9925310; doi:10.7150/thno.81067), 2023-01-22
Supplement: thnov13p1059s1.pdf [file thnov13p1059s1.pdf]

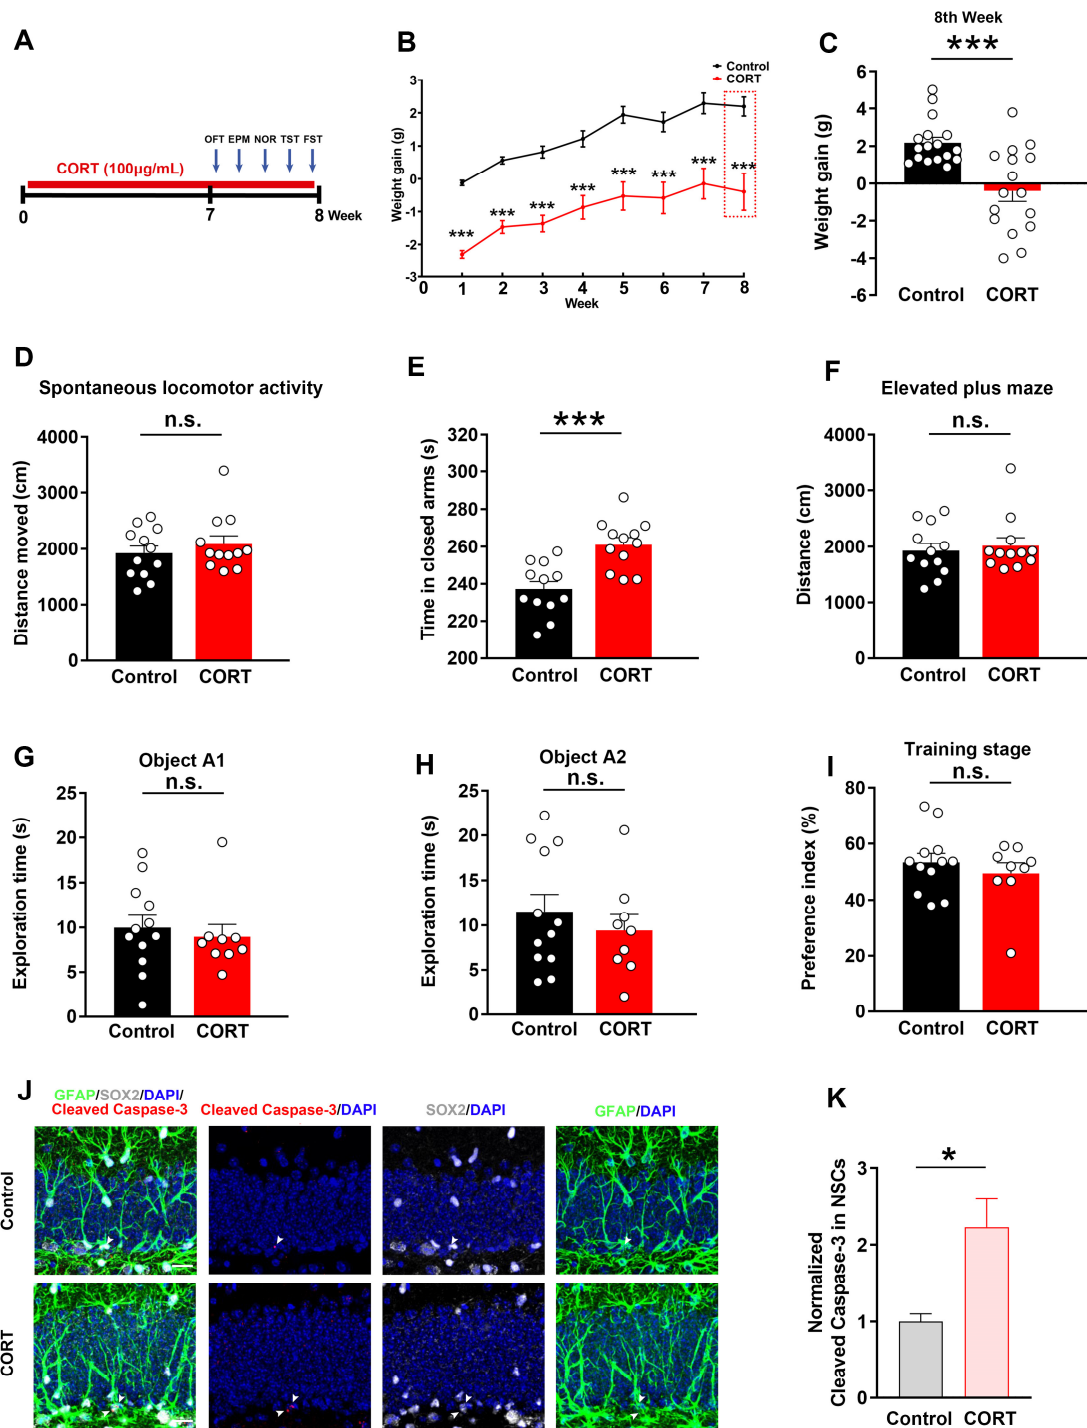

**Figure S1. The effect of chronic corticosterone (CORT) treatment on behaviors, NSC apoptosis and neuronal BDNF. (A)** Timeline of the experimental procedure. **(B)** Line chart showing body weight gain. Control (n = 17), CORT (n = 6),  $P < 0.001$ . **(C)** Body weight gain in the eighth week. Control (n = 17), CORT (n = 16),  $P = 0.0002$ . **(D)** Distance

moved while assessing locomotor activity.  $n = 12$  per group,  $P = 0.4033$ . **(E)** Time spent in the closed arms of the EPM.  $n = 12$  per group,  $P = 0.0003$ . **(F)** Distance moved in the EPM.  $n = 12$  per group,  $P = 0.6474$ . **(G)** Exploration time for object A1 in the training stage of the NOR test.  $n = 12$  per group,  $P = 0.6176$ . **(H)** Exploration time for object A2 in the training stage of the NOR test.  $n = 12$  per group,  $P = 0.4432$ . **(I)** Preference index in the training stage of the NOR test. Control ( $n=12$ ),  $P = 0.4330$ . **(J)** Representative images of control and CORT DG with triple immunostaining of SOX2<sup>+</sup> (gray), GFAP<sup>+</sup> (green), and cleaved-caspase 3<sup>+</sup> (red) cells. Arrowheads indicate SOX2<sup>+</sup>/GFAP<sup>+</sup>/cleaved-caspase 3<sup>+</sup> cells. **(K)** Quantification of SOX2<sup>+</sup>GFAP<sup>+</sup>cleaved-caspase 3<sup>+</sup> cells.  $n = 4$  mice per group,  $P = 0.0182$ . Scale bar = 20  $\mu\text{m}$ . Data are presented as the mean  $\pm$  SEM. Two-tailed unpaired  $t$ -test was used to identify statistically significant differences between datasets ( $*P < 0.05$ ,  $**P < 0.01$ ,  $***P < 0.001$  compared to the control group). n.s., non-significant difference.

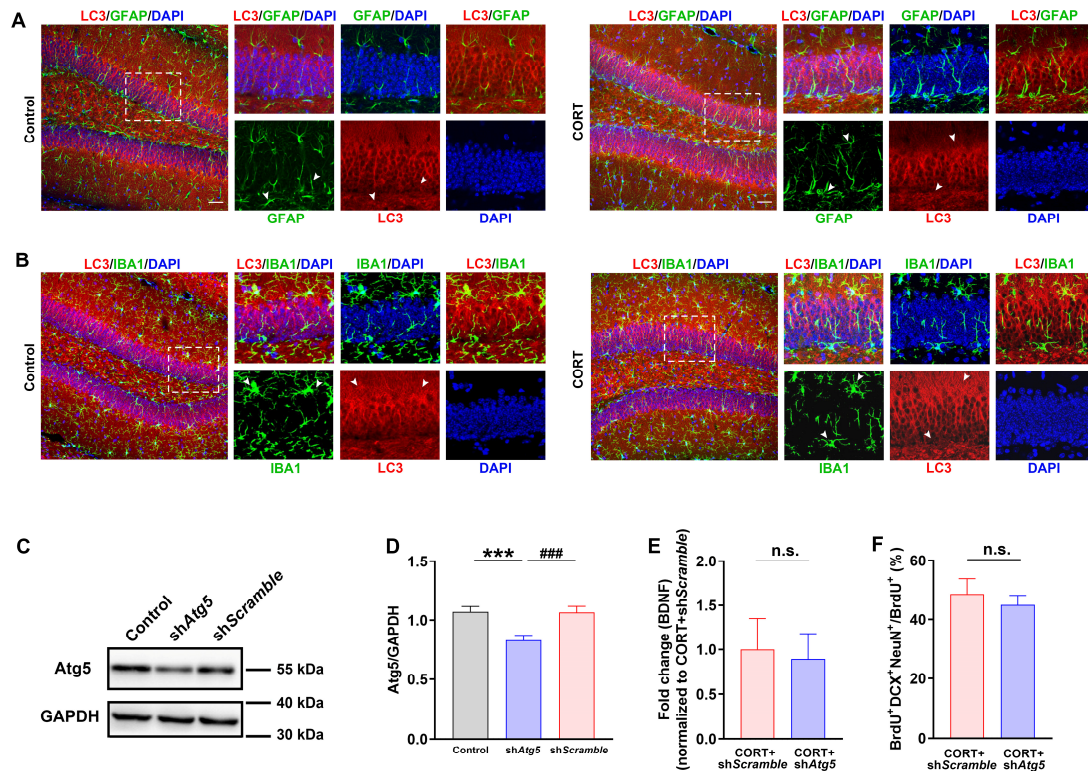

**Figure S2. The effect of chronic CORT on autophagy in astrocytes and microglia in mice.** (A) Representative images of control and CORT DG with double immunostaining of LC3<sup>+</sup> (red) and GFAP<sup>+</sup> (green) cells. The boxed areas are enlarged in the right panels. White arrowheads indicate LC3<sup>+</sup>/GFAP<sup>+</sup> cells. (B) Representative images of control and CORT DG with double immunostaining of LC3<sup>+</sup> (red) and IBA1<sup>+</sup> (green) cells. The boxed areas are enlarged in the right panels. White arrowheads indicate LC3<sup>+</sup>/IBA1<sup>+</sup> cells. (C) Representative western blots analyzing protein expression in control, control+sh*Atg5* and control+sh*Scramble* groups. (D) Quantification of *Atg5* expression.  $n = 3$  mice per group,  $P < 0.0001$ . (E) Quantification of BDNF gene mRNA expression.  $n = 4$  mice per group,  $P = 0.8135$ . (F) Quantification of BrdU<sup>+</sup>DCX<sup>+</sup>NeuN<sup>+</sup>/BrdU<sup>+</sup> cells.  $n = 3$  mice per group,  $P = 0.5394$ . Data are presented as mean  $\pm$  SEM. The two-tailed unpaired *t*-test was used to identify statistically significant differences between datasets (\*\*\* $P < 0.001$  compared

to control group,  $###P < 0.001$  compared to CORT+sh*Scramble* group). n.s., non-significant difference.
